1 **Genotype-dependent and heat-induced grain chalkiness in rice correlates with the expression**  
2 **patterns of starch biosynthesis genes**

3

4

5 Peter James Gann<sup>1,2</sup>, Manuel Esguerra<sup>3</sup>, Paul Allen Counce<sup>1,2,3</sup> and Vibha Srivastava<sup>1,2,4</sup>

6

7

8 <sup>1</sup>Cell and Molecular Biology Program, <sup>2</sup>Department of Crop, Soil and Environmental Sciences, University  
9 of Arkansas, Fayetteville; <sup>3</sup>Rice Research and Extension Center, Stuttgart, Arkansas; <sup>4</sup>Department of  
10 Horticulture, University of Arkansas, Fayetteville

11

12

\***Author for correspondence:** 115 Plant Science Bldg., University of Arkansas, Fayetteville, AR 72701,  
e-mail: [vibhas@uark.edu](mailto:vibhas@uark.edu), Tel: 479-575-4872, Fax: 479-575-7465.

13

**Running title:** Role of starch biosynthesis genes in grain chalkiness of rice

14

15 **ABSTRACT**

16 To understand the molecular basis of environment-induced and genotype-dependent chalkiness, six rice  
17 genotypes showing variable chalk levels were subjected to gene expression analysis during reproductive  
18 stages. In the high chalk genotypes, the peak expressions of *ADP-Glucose Pyrophosphorylase (AGPase)*  
19 *Large Subunit 4 (AGPL4)* occurred in the stages before grain filling commenced, creating a temporal gap  
20 with the upregulation of *Granule Bound Starch Synthase I (GBSSI)* and *Starch Synthase IIA (SSIIA)*.  
21 Whereas, in the low chalk genotypes, *AGPL4* expression generally occurred in later stages, close to the  
22 upregulation of *GBSSI* and *SSIIA*. However, heat treatment altered the expression pattern and created a gap  
23 between the expression peaks of *AGPL4*, and *GBSSI* and *SSIIA*. This change was accompanied by  
24 transformed granular morphology, increased protein content, and chalkiness in the grains. *AGPL4*  
25 expression pattern may partially explain chalkiness as it contributes to the pool of ADP-Glucose for  
26 producing amylose and amylopectin, the major components of the starch. Down-regulation of *AGPase*  
27 during grain filling stages could result in a limited pool of ADP-Glucose leading to inefficient grain filling  
28 and air pockets that contribute to chalkiness. The study suggests a mechanism of grain chalkiness based on  
29 the coordination of the three starch biosynthesis genes in rice.

30

31 **Keywords:** Chalkiness, Starch Biosynthesis, Rice Grain, High Nighttime Temperature

32

33 **Significance statement:** Genotype-dependent and heat-induced grain chalkiness in rice is partially based  
34 on the increased gap between the upregulation *AGPase* and that of *GBSSI* and *SSIIA* through reproductive  
35 stages. This temporal gap could limit starch accumulation and alter granular morphology, eventually  
36 leading to grain chalkiness.

37

## 38 INTRODUCTION

39 Starch is the primary carbon and energy reserve in rice endosperm. Physical, granular and chemical  
40 properties are the measures of grain quality, which are dependent on the starch biosynthesis process. Grain  
41 chalkiness is a highly undesirable trait in rice, which is genotype-dependent and induced by the high  
42 nighttime temperature (HNT) (Feng et al. 2017; Jagdish et al. 2015; Lanning et al. 2011; Xu et al. 2020).  
43 Coordination of the enzymes involved in this process is important to prevent chalk formation in the grain  
44 that affects the market value, cooking and eating quality of rice (Fitzgerald & Resurreccion 2009; Lisle et  
45 al. 2000).

46 Briefly, starch biosynthesis starts after fertilization, when the endosperm cells multiply, form cell  
47 walls and elongate. Prior to starch biosynthesis, cell walls must be present along with the appropriate  
48 contingent of cell organelles. Formation and elongation of cell walls utilizes imported sucrose. There are  
49 three sucrolytic enzymes that breakdown sucrose in the endosperm namely acid invertase, neutral invertase  
50 and sucrose synthase. However, early cell wall development is largely dependent on the action of acid  
51 invertase to convert the sucrose into glucose and fructose. Consequently, sucrose is also catalyzed by neutral  
52 Cell Wall Invertases (*OsCIN*) (Abu-Zaitoon et al. 2012; Wang et al. 2008). Besides contributing to cell wall  
53 development, vacuolar acid invertase (*INV3*), sucrose synthase (*RSUS1*) also contributes to the elongation  
54 of the cell (Hirose, et al. 2004; Ishimaru et al. 2005). After the cell wall and organelles form, the grain  
55 begins to fill.

56 During grain filling, UDP-glucose, glucose and fructose, metabolic products of sucrolytic enzymes,  
57 are converted to Glucose-1-Phosphate by several enzymes. ADP-glucose pyrophosphorylase (AGPase)  
58 catalyzes the production of ADP-glucose from Glucose-1-Phosphate. Subsequently, two separate  
59 biochemical pathways for adding glucose to  $\alpha$ -glucan chains of amylopectin by starch synthases (SS) and  
60 to amylose via Granule Bound Starch Synthases (GBSS) commence (Pfister & Zeeman, 2016). AGPase  
61 consists of four subunits, *AGPL2* and *AGPL4* as the regulatory large subunits, and *AGPS1* and *AGPS2* as  
62 the catalytic small subunits (Tuncel et al. 2014). AGPase catalyzes the rate-limiting reaction converting

63 Glucose-1-Phosphate and ATP to ADP-Glucose and Pyrophosphate (Iglesias & Preiss,1992; Sivak &  
64 Preiss, 1998). With the reversibility of the AGPase-catalyzed reaction, the follow up expression of GBSS  
65 and SS is important to utilize ADP-Glucose and prevent the futile cycle of converting ADP-Glucose back  
66 to Glucose-1-Phosphate (Barratt et al. 2009 and Baroja-Fernandez et al. 2012).

67 ADP-Glucose serves as the substrate for GBSS and SS, two enzymes with multiple isoforms. GBSS  
68 synthesizes amylose with  $\alpha(1 \rightarrow 4)$  glycoside linkage, and SS elongates polysaccharide chain with  $\alpha(1 \rightarrow$   
69  $4 \text{ \& } 1 \rightarrow 6)$  glycoside linkages synthesizing amylopectin. *GBSSI* and *SSIIA* are the highly expressed  
70 isoforms in the rice endosperm during grain filling stages (Hirose et al. 2004; Ohdan et al. 2005; Umemoto  
71 et al. 2002; Xing et al. 2016). Mutations in starch synthase genes have been described to affect grain  
72 chalkiness by altering the granular morphology from compound polyhedral type to simple spherical type  
73 (Toyosawa et al. 2016; Kusano et al. 2012). The simple spherical granules constitute the chalk portion as  
74 they pack loosely and include airspaces (Kaneko et al. 2016; Kim et al. 2004; Lu et al. 2015; Mitsui et al.  
75 2016). Thus, starch synthesis genes play a major role in determining grain quality; however, their  
76 coordination with one another and expression patterns related with chalky or translucent grains has not been  
77 fully understood.

78 Some of the other mechanisms that control grain chalkiness are related to the starch accumulation  
79 process. For example, disruption of the amyloplast's outer envelope membrane (OEM) during seed  
80 maturation leads to the formation of simple and spherical granules (Toyosawa et al. 2016), and early  
81 degradation of starch through amylase activity contributes to grain chalkiness. Micropores on the surfaces  
82 of rough amyloplast in the chalky grains indicate starch degradation by amylase activities (Lin et al. 2016).  
83 Finally, protein bodies in the endosperm are also correlated with chalkiness. Several studies showed that  
84 chalky rice contains abnormal protein bodies in the endosperm that are large in size and accommodate more  
85 air spaces (Nagamine et al. 2011; Ren et al. 2014; and Fukuda et al. 2011).

86 In this study, rice genotypes consisting of well-known chalky varieties and low chalk cultivars were  
87 subjected to gene expression analysis as well as the analysis of grain physical characteristics, starch  
88 components, and the granular morphology. The expression pattern of *AGPL4*, *GBSSI* and *SSIIA* was found  
89 to be genotype-dependent and heat-sensitive, which highlights the importance of coordinated starch  
90 biosynthesis during the critical stages of grain filling to produce properly filled non-chalky, translucent rice  
91 grains. The disruption in the expression pattern of starch biosynthesis genes by heat appears to be a part of  
92 the mechanism associated with the environment-induced chalkiness.

93

## 94 MATERIALS AND METHODS

95

96 **Plant materials.** Six genotypes, ZHE 733, Nagina 22 (N22), Nipponbare (Nip), Taggart, Diamond, and  
97 LaGrue, representing *indica*, *aus* or *japonica* sub-species were used in this study. These genotypes included  
98 3 cultivars (Taggart, Diamond, and LaGrue) developed at Arkansas Rice Research Center. Three  
99 replications of each genotype were planted on July 2019 in the greenhouse. When plants were at R0 or R1  
100 stage (Moldenhauer et al. 2018), they were transferred to growth chambers. For the normal condition, the  
101 temperature was set at 30°C day / 22°C night, and for heat-stress at 30°C day / 28°C night with nighttime  
102 starting at 8PM and ending at 6AM. Relative humidity and lighting conditions were uniform for the two  
103 set-ups. The rice plant culms entering the reproductive stage were tagged, and used as the source of samples  
104 for the different stages, namely before panicle emergence (BP) (R2), early flowering/after panicle  
105 emergence (AP) (R3 or R4), 5 days after flowering (DAF) (R5 to R6), 10DAF(R6), 15DAF (R8) and  
106 20DAF (R8) (Moldenhauer et. al., 2018). For the granular, physical, and chemical properties, grains from  
107 the second panicle were collected at 25DAF. Immediately after collection, the samples for gene expression  
108 analysis were frozen in liquid nitrogen and stored at -80 °C.

109

110 **Grain physical property.** Grains collected at 25DAF were dried under room temperature for two weeks  
111 after harvesting, prior to the observation for chalkiness, and powdered by a cyclone milling machine for the

112 chemical property analysis. Chalkiness was measured using WinSEEDLE™ with 150 grains for each  
113 genotype. The percentage of chalky grains and the average chalk size per grain were taken as measurements  
114 of chalkiness.

115  
116 **Gene expression from databases.** Heatmaps were generated to select the appropriate genes for the starch  
117 biosynthetic pathway of interest. RiceExpro was used under the category datasets and gene expression  
118 profile at different ripening stages (7DAF, 10DAF, 14DAF, 21DAF, 28DAF, and 42DAF) relevant to the  
119 stages selected for gene expression analysis by qPCR.

120  
121 **Transcript levels.** Total RNA was isolated using Trizol (Invitrogen Inc.) and quantified using Nano-drop  
122 2000 (Thermo-Fisher Inc). Two micrograms of total RNA were treated with RQ1-RNase free DNase  
123 (Thermofisher Inc.), and one microgram of the DNase-treated RNA was used for cDNA synthesis using  
124 PrimeScript RT reagent kit (Takara Bio, CA, USA). The expression analysis was performed using TB green  
125 Premix Ex Taq II (Takara Bio, CA, USA) on Bio-Rad CFX 96 C1000 with following conditions: 95°C for  
126 30 sec. and 40 cycles of 95°C for 5 sec + 60°C for 30 sec. The product specificity was verified by the melt  
127 curve analysis. The Ct values of genes-of-interest were normalized against *7Ubiquitin fused protein* as the  
128 reference gene.

129  
130 **Granular morphology.** Grains were split in two using a microtome for the cross-section perspective.  
131 Cross-section of the grains were viewed under Philips/Fei XL-30 Environmental Scanning Electron  
132 Microscope (ESEM) with the settings Acc V. of 10kV, 2000x magnification, 3.0 spot and 10 µm bar. The  
133 surfaces of whole grains were captured both in low and high magnifications. Captured images were adjusted  
134 to brightness of 20, color balance of R (0), G (0) and B (-20), and gamma correction of 1.00.

135  
136 **Biochemical Analysis.** The amylose and amylopectin content of grains were determined using the  
137 Megazyme amylose/amylopectin assay (K-AMYL) following the manufacturer's method. Protein

138 quantification was done using 50 mg of grain powder in 1 ml of TE buffer pH 8.0 using Bradford assay  
139 against a standard curve of BSA (0, 2.5, 5, 7.5, and 10 µg/ml). Absorbance was read at 595 nm in Bio-Rad  
140 SmartSpec 3000 spectrophotometer.

141 **Data analysis.** The experiment was conducted in a completely randomized design with three independent  
142 replications. Data were subjected to one-way analysis of variance (ANOVA). To determine the significant  
143 differences in the amylose and amylopectin content and protein concentration, Tukey's range test was used  
144 to compare the genotypes under normal condition, and Student's T-test for pairwise comparison in the  
145 normal and heat conditions. All statistical analyses were performed in SAS statistical software (version 9.4,  
146 SAS Institute Inc., Cary, NC).

147

## 148 **RESULTS AND DISCUSSION**

149

### 150 **Expression patterns of starch biosynthesis genes**

151 The heatmap based on the publicly available databases showed genes encoding the four subunits  
152 of plastidial *AGPase* are expressed differentially. *AGPS1* and *AGPL2* are consistently expressed, indicating  
153 the availability of these subunits throughout the reproductive stages, while *AGPS2* is consistently  
154 downregulated. *AGPL4*, on the other hand, is upregulated at 7DAF followed by continual decline in  
155 subsequent stages (**Figure 1**). This pattern suggests that temporal expression of *AGPL4* is critical for  
156 plastidial AGPase complex formation. *AGPL1* is a unique subunit in the cytosolic AGPase, which is  
157 upregulated until 21DAF (**Figure 1**). The resulting cytosolic ADP-Glucose passes through the transporters  
158 to enter the amyloplast for starch biosynthesis (Pfister & Zeeman, 2016). However, suppression of cytosolic  
159 AGPase in barley did not change the granular morphology, an important indicator of chalkiness in rice  
160 (Johnson et al. 2003). This suggests that the plastidial AGPase, possibly owing to its *in situ* expression,  
161 could have a greater effect on granular morphology and grain chalkiness.

162 Similarly, heatmap of GBSS showed that *GBSSII* is downregulated during advancing stages of  
163 grain filling (14DAF onwards), while *GBSSI* is consistently expressed. Further, *SSI* and *SSIIB* are

164 downregulated between 7 – 21DAF, and *SSIIA* is consistently expressed up to 42DAF (**Figure 1**). These  
165 observations matched the previous study, which described *SSIIA* as the steady expresser in all grain filling  
166 stages, and *GBSSI* as highly expressed in the mid until the late grain filling stages (Hirose & Terao 2004).  
167 Previous studies have also described the roles of differential expression of individual genes in starch  
168 biosynthesis. Upregulation of *SSI* at 28 and 42DAF indicates that it plays a role in synthesizing amylopectin  
169 during late stages. Corroborating with this, suppression of *SSI* by RNAi decreased amylopectin and altered  
170 the granular structure from compound to a simple type in Nipponbare (Zhao et al. 2019). *GBSSI* and *SSIIA*  
171 are expressed at higher levels than *AGPL4* throughout the reproductive stages in the endosperm, suggesting  
172 a rate limiting effect of *AGPL4*. Several studies have shown that mutations and RNAi suppression of *GBSSI*  
173 changes the amylose content in rice (Dobo et al. 2010; Liu et al. 2014; Miura et al. 2018). Variations and  
174 deficiency in *SSIIA* have been found to alter amylopectin and starch quality (Nakamura et al. 2005; and  
175 Miura et al. 2018). Therefore, *GBSSI* and *SSIIA* play significant roles in starch biosynthesis by controlling  
176 amylose and amylopectin content and the granular structure, and a rate limiting effect is possibly imposed  
177 by *AGPL4* expression pattern.

178

### 179 **Grain chalkiness in different genotypes**

180 The opaque white in the grains indicates the chalky portion. The six genotypes used in this study  
181 were found to have different levels of chalkiness based on which they were classified as high-chalky or  
182 low-chalky. High-chalky lines, ZHE 733, Nipponbare, and Nagina 22, contain large opaque areas (**Figure**  
183 **2A-C**), while the three low-chalky cultivars, Diamond, Taggart, LaGrue, contain no chalk or small chalky  
184 areas (**Figure 2D-F**). These groups are also distinguished by the frequency at which large or small chalk  
185 occur in the grains. In the high-chalky lines, chalk was observed in all grains, with the majority (average of  
186 82%) showing large chalk (>20% of grain size), in addition to small (<10% of grain size) and medium (11-  
187 20% of grain size) size chalk (**Figure 3A-C**). On the other hand, in low-chalky cultivars, small chalk was  
188 found in the majority of the grains (average of 84%) with a small percentage (2-4%) showing no chalk



189 **(Figure 3D-F)**. Among the low-chalky cultivars, LaGrue **(Figure 3F)** was found to contain more chalk  
190 (medium sizes) than Taggart or Diamond **(Figure 3D-E)**.

191

### 192 **Expression patterns of *AGPL4*, *GBSSI* and *SSIIA***

193 To understand how dynamics of starch biosynthesis controls grain chalkiness, gene expression  
194 analysis was performed in the spikelets of each line at six reproductive stages (BP, EF, 5DAF, 10DAF,  
195 15DAF and 20DAF). Previous studies showed a direct correlation of mRNA abundance and enzyme  
196 activities of *AGPase*, *GBSS* and *SS* (Devi et al. 2010; Ponnala et al. 2014); therefore, gene expression  
197 directly correlates with the protein abundance and informs the dynamics of the starch biosynthesis process.  
198 High-chalky lines (ZHE 733, Nipponbare, Nagina 22) showed a characteristic pattern consisting of peak  
199 *AGPL4* expression at BP or AP with *GBSSI* and *SSIIA* peaks at 10DAF or 20DAF **(Figure 4A-C)**, showing  
200 a temporal gap of ~15 days. Notably, in all three lines, *GBSSI* upregulation preceded that of *SSIIA*. ADP-  
201 Glucose, the product of *AGPase*, is unstable by nature (Baratt et al. 2009; Baroja-Fernandez et al. 2012);  
202 therefore, formation of ADP-Glucose before endosperm development would likely result in its non-  
203 utilization and reversal to Glucose-1-Phosphate. Further, since *AGPL4* is expressed at relatively lower  
204 levels during grain filling stages **(Figure 4A-C)**, only a limited pool of ADP-Glucose, the substrate for  
205 *GBSS* and *SS*, is presumably available to synthesize starch components, amylose and amylopectin.  
206 Concurring with these observations, a previous study showed that uncoordinated expression of *AGPase*  
207 subunit genes (*AGPL3*, *AGPL4* and *AGPLS2*), subsequent to the peak expression of *GBSS* and *SS*, was  
208 associated with the inferior grains (Sun et al. 2015).

209 The three cultivars, on the other hand, showed a more coordinated pattern of expression  
210 characterized by the peak-expression of *AGPL4* followed quickly by the upregulation of *GBSSI* and *SSIIA*  
211 **(Figure 4D-F)**. In Taggart, *AGPL4* peak occurred at 5DAF, followed immediately by the peaks of *GBSSI*  
212 and *SSIIA* at 10DAF **(Figure 4D)**. Therefore, a sufficient pool of ADP-Glucose is presumably available for  
213 *GBSS* and *SS* to efficiently synthesize amylose and amylopectin, respectively, in the early phases of grain  
214 filling. This coordinated process leads to proper loading of starch in the form of edged granules, eventually

215 forming non-chalky translucent grains. Another cultivar, Diamond, shows somewhat shifted expression  
216 peaks with *AGPL4* spike at AP that is quickly followed by the increase in both *GBSSI* and *SSIIA* activities  
217 at 5DAF and subsequent stages (**Figure 4E**). Thus, in Diamond, AGPase accumulates just before  
218 fertilization, and efficient starch synthesis commences soon after at 5DAF, possibly utilizing the pool of  
219 ADP-Glucose produced at the AP stage. Finally, LaGrue shows extended upregulation of *AGPL4* until  
220 10DAF with gradual decline in the subsequent stages. This pattern either coincides or is immediately  
221 followed by *GBSSI* and *SSIIA* expression (**Figure 4F**), presumably allowing efficient conversion of ADP-  
222 Glucose to amylose and amylopectin. Finally, *GBSSI* expression is relatively higher than *SSIIA* at their  
223 peaks in all genotypes except LaGrue (**Figure 4F**) that showed higher *SSIIA* than *GBSSI* at 20DAF. This  
224 suggests active synthesis of amylopectin at this stage in LaGrue. However, as shown in Figure 1 and  
225 elucidated by others, amylopectin can be converted to amylose by starch debranching enzyme (*SDBE*) at  
226 later stages (Cheng et al. 2005).

227 In summary, the coordination between *AGPL4* and the two starch synthase genes, *GBSSI* and *SSIIA*,  
228 was evident in the three cultivars (low-chalk lines), while a gap of ~15 days between the peak expression  
229 of *AGPL4* and the starch synthase genes was observed in the high-chalky lines. This temporal gap may  
230 result in futile ADP-Glucose reaction, and a limited pool during the critical stages of grain filling.

231

## 232 **Granular morphology**

233 SEM images showed differences in the granular morphology in high-chalky and low-chalky lines  
234 (**Figure 5**). Cross-section of the grains of high-chalky lines revealed simple granules of spherical (**Figure**  
235 **5A**) or polyhedral shape (**Figure 5B-C**). Simple granules are mostly small in size, which points to early  
236 termination of amylose and amylopectin elongation. This hypothesis is supported by the expression analysis  
237 (**Figure 4A**) that suggested insufficiency of ADP-Glucose for amylose and amylopectin synthesis at the  
238 early grain filling stages. Simple granules allow more air spaces, which further elucidates the chalkiness of  
239 these genotypes. The high-chalky lines, Nipponbare and Nagina 22, show polyhedral granules of simple  
240 and compound types (**Figure 5B-C**). However, the sizes of the compound granules are not uniform. This

241 heterogeneity of granules results in loose and irregular packing that explains the chalkiness in these  
242 genotypes. Protein bodies, as described by Kasem et al. (2011), are also observed in between and at the  
243 surface of the amyloplasts of ZHE 733 and Nipponbare, respectively (**Figure 5A-B**).

244 Grains from low-chalky lines (cultivars) showed compact granular structure (**Figure 5D-F**). These  
245 granules appear compound type, suggesting their origin from efficient chain elongation and biosynthesis of  
246 starch (Toyosawa et al. 2016). Compound granules are large and can be an aggregate of smaller granules  
247 packed very tightly. This kind of granules is produced when substrates and enzymes are sufficiently  
248 available at the critical stages of grain filling. These conditions appear to be fulfilled in the low-chalky  
249 cultivars, as indicated by the coordinated expression pattern of starch synthesis genes (**Figure 4D-F**).  
250 Moreover, the granules are homogeneous affording tight packing and preventing air spaces in the grains.  
251 Further, smaller protein bodies were observed in the cultivars. However, micropores were observed in the  
252 amyloplastic surface of Diamond, indicating possible degradation by  $\alpha$ -amylases (**Figure 5E-F**). Similar  
253 granular structures were observed in previous studies on the chalky grains (Lin et al. 2016; Kaneko et al.  
254 2016; and Mitsui et al. 2016).

255

## 256 **Biochemical analysis**

257 Higher amylose content was observed in the high-chalky lines as compared to the low-chalky lines  
258 (**Figure 6**). Within the high-chalky group, the indica rice ZHE 733, that shows simple and spherical  
259 granules (**Figure 5A**), contained significantly higher amylose fraction (**Figure 6A**). Although,  
260 physicochemical properties of the indica and japonica rice may differ, high amylose cultivars have generally  
261 been reported to show simple granular morphology under SEM (Zhang et al. 2017). A possible mechanism  
262 underlying this phenotype is the premature termination of  $\alpha$ -glucan chain elongation due to insufficiency  
263 of ADP-Glucose at the grain filling stages as suggested by the *AGPL4* expression pattern (**Figure 4A**). As  
264 a result, shorter chains are generated and branching (1  $\rightarrow$  6) in the amylopectin is reduced, leading to simple  
265 granules. This analogy is reinforced by observations that high amylose rice grains contain shorter  $\alpha$ -glucan

266 chain length (Park et al. , 2007). However, SDBE mediated debranching of amylopectin can also lead to  
267 higher amylose (Cheng et al. 2005; **Figure 1**).

268 Low-chalky cultivars were found to contain significantly higher amylopectin content (**Figure 6D-**  
269 **E**), which corroborates with a previous study that found the association of higher amylopectin with lower  
270 chalkiness (Lin et al. 2016). Higher amylopectin can be attributed to an efficient starch biosynthetic process  
271 and longer  $\alpha$ -glucan chain lengths. This efficiency arguably relies on the coordinated expression of *AGLP4*,  
272 *GBSSI* and *SSIIA* as suggested by the gene expression analysis on the low-chalky cultivars (**Figure 2D-F**).

273 Regardless of the chalkiness, amylopectin is higher than amylose in all lines despite lower  
274 expression of *SSIIA* relative to *GBSSI* (**Figure 4**). This suggests that other isoforms of SS actively  
275 participate in the catalysis of the same biochemical pathway to synthesize amylopectin, especially *SSI* that  
276 is upregulated during 28-42DAF (**Figure 1**). Accordingly, *SSI* mutants show decrease in amylopectin  
277 content (Abe et al. 2014). However, starch branching enzymes (SBE) also contributes to the pool of  
278 amylopectin, and mutagenesis of *SBEIIB* by CRISPR/Cas9 decreased amylopectin in rice grains (Sun et al.  
279 2017).

280 Higher protein content has also been linked to higher chalkiness (Yamakawa & Hakata, 2010).  
281 Nipponbare and Nagina 22, the two high-chalky lines, were found to have highest protein concentrations  
282 (**Figure 7**), suggesting that higher number of protein bodies in these genotypes could contribute to grain  
283 chalkiness. ZHE 733, on the other hand, showed a similar level of protein content as the three cultivars,  
284 suggesting proteins bodies do not play a major role in the chalkiness of ZHE 733.

285

## 286 **Effect of heat stress on the expression patterns**

287 Heat stress has a major effect on grain chalkiness. Under high nighttime temperature (HNT), there  
288 is increased formation of chalk accompanied with the changes in the expression of starch biosynthesis genes  
289 (Lanning et al. 2010, Nevame et al. 2018; Dhatt et al. 2019). To determine whether alteration in the  
290 expression patterns is a part of the mechanism associated with the HNT-induced chalkiness, three

291 genotypes, ZHE 733, Diamond, and LaGrue were analyzed under HNT conditions. Of these three, ZHE  
292 733 is chalky in the normal condition without heat treatment (Esguerra et al. 2019).

293       Upon HNT treatment, all three genotypes showed altered expression of *AGPL4*, *GBSSI* and *SSIIA*.  
294 In the cultivar Diamond, the most striking alteration occurred in *AGPL4* expression pattern, which was  
295 upregulated at BP but downregulated in subsequent stages (**Figure 8A**). This concurs the expression pattern  
296 of other AGPase subunit genes in plants under HNT stress. Dhatt et al. (2019) reported that *AGPS2* and  
297 *AGPL2* are downregulated during 7-10DAF and upregulated at 4DAF under HNT condition. In LaGrue,  
298 *AGPL4* spiked at an earlier stage (AP) by HNT with a rapid decline in the subsequent stages. Whereas in  
299 the normal condition, it is gradually increased during early grain filling stages (**Figure 8B**). Additionally,  
300 *GBSSI* and *SSIIA* in LaGrue were markedly elevated by HNT, which may lead to hyperactivity of these  
301 enzymes and depletion of ADP-Glucose in subsequent stages. Finally, ZHE 733, which is equally chalky  
302 in the normal and HNT conditions (Esguerra et al. 2019), showed a similar expression pattern of the three  
303 genes. The relative expression of *AGPL4* is elevated and that of *GBSSI* and *SSIIA* is suppressed by HNT  
304 for ZHE 733 (**Figure 8C**).

305       Next, physical, granular, and chemical properties of grains in Diamond and LaGrue were analyzed.  
306 The chalk distribution and grain morphology in the two cultivars completely changed upon HNT treatment.  
307 In the normal condition, these cultivars produced low-chalky grains; however, under HNT, both cultivars  
308 developed large chalky areas (**Figure 9A-B**). Interestingly, the granular morphology under HNT was  
309 different in the two cultivars. The HNT-Diamond developed simple, spherical granules (**Figure 9C**);  
310 whereas HNT-LaGrue retained compound polyhedral granules. However, HNT-LaGrue developed many  
311 shreds and micropores (**Figure 9D**). Notably, the granular morphology of HNT-Diamond resembled that  
312 of ZHE 733 (**Figure 5A, Figure 9C**). Interestingly, the expression patterns of starch synthesis genes in  
313 HNT-Diamond was also similar to that of ZHE 733 (**Figure 4A, Figure 8A**). The formation of compound  
314 polyhedral granules in HNT-LaGrue is consistent with the upregulation of *AGPL4*, *GBSSI*, and *SSIIA*  
315 (**Figure 8B**). However, abundance of shreds and micropores in HNT-LaGrue points to amylase attack as  
316 part of the mechanism.

317 Finally, amylose and protein contents were determined under normal and HNT conditions. In  
318 Diamond, no significant difference in the amylose content was observed between the two conditions, while  
319 in LaGrue an increase in the amylose content was observed in the HNT grains (**Figure 9E**). Previous studies  
320 have reported both increase or decrease in amylose content in response to HNT (Ahmed et al. 2014; Cheabu  
321 et al. 2018). However, the protein content in both cultivars increased significantly under HNT (**Figure 9F**).  
322 Increased protein content has been associated with higher number of protein vesicles that contribute to the  
323 grain chalk (Kaneko et al. 2016).

324

## 325 CONCLUSIONS

326 In conclusion, coordinated expression of starch biosynthesis genes is important in developing  
327 compound polyhedral granules associated with the non-chalky translucent rice grains. Perturbation of this  
328 process by HNT leads to altered granular structure conferring grain chalkiness. Other factors such as  
329 number of protein bodies and amylase activities also play a significant role in grain chalkiness, apparently  
330 in a genotype-dependent manner. Nevertheless, in the early phases of grain development, efficient synthesis  
331 of starch through the coordinated activities of AGPase, GBSS and SS is arguably the most important  
332 mechanism controlling granular morphology in a genotype-dependent manner. In the coordinated  
333 expression pattern, AGPase is upregulated early in the reproductive phase, closer to the grain filling stages,  
334 to produce abundant pool of ADP-Glucose, which is quickly utilized by GBSS and SS to produce amylose  
335 and amylopectin in amyloplasts. This streamlined process leads to uniform polyhedral granules that pack  
336 tightly and produce non-chalky grains (**Figure 10A**). However, when AGPase is upregulated too early in  
337 the reproductive phase, the resulting ADP-Glucose reverts back to Glucose-1-P. As a result, only a limited  
338 pool of ADP-Glucose is presumably available for starch synthesis during the early grain filling stages. This  
339 uncoordinated process could lead to early termination of chain elongation, producing smaller granules of  
340 heterogeneous shapes (**Figure 10B**). These simpler spherical or heterogeneous granules pack more loosely  
341 and accommodate air spaces observed as chalk in the mature grains.

342

343 **REFERENCES**

- 344 Abe N., Asai H., Yago H., Oitome N.F., Itoh R., Crofts N., Nakamura Y. & Fujita N. (2014). Relationships  
345 between starch synthase I and branching enzyme isozymes determined using double mutant rice  
346 lines. *BMC Plant Biology*. doi: <https://doi.org/10.1186/1471-2229-14-80>.
- 347 Abu-Zaitoon Y.M., Bennett K., Normanly J. & Nonhebel H.M. (2012). A large increase in IAA during  
348 develop-ment of rice grains correlates with the expression of tryptophan aminotransferase OsTAR1  
349 and a grain-specific YUCCA. *Physiologia Plantarum*, 146(4), 487–499.
- 350 Ahmed, N., Tetlow, I.J., Nawaz, S., Iqbal, A., Mubin, M., Nawaz ul Rehman, M.S., Butt, A., Lightfoot,  
351 D.A. and Maekawa, M. (2015). Effect of high temperature on grain filling period, yield, amylose  
352 content and activity of starch biosynthesis enzymes in endosperm of basmati rice. *Journal of the*  
353 *Science of Food and Agriculture*, 95, 2237-2243.
- 354 Baroja-Fernández E., Muñoz F.J., Li J., Bahaji A., Almagro G., Montero M., et al. (2012). Sucrose synthase  
355 activity in the sus1/sus2/sus3/sus4 Arabidopsis mutant is sufficient to support normal cellulose and  
356 starch production. *Proceedings of the National Academy of Sciences USA*, 109, 321-326.
- 357 Barratt D., Derbyshire P., Findlay K., Pike M., Wellner N., Lunn J., Feil R., Simpson C., Maule A. & Smith,  
358 A. (2009). Normal growth of Arabidopsis requires cytosolic invertase but not sucrose synthase.  
359 *Proceedings of the National Academy of Sciences USA*, 106, 13124-9.
- 360 Cheabu S., Moung-Ngam P., Arikrit S., Vanvichit A. & Malumpong C. (2018). Effects of heat stress at  
361 vegetative and reproductive stages on spikelet fertility. *Rice Science*, 25(4), 218-226.
- 362 Cheng F., Zhong L., Zhao N., Liu Yi. & Zhang G.P. (2005). Temperature induced changes in the starch  
363 components and biosynthetic enzymes of two rice varieties. *Plant Growth Regulation*, 46, 87-95.
- 364 Devi T.A., Sarla N., Siddiq E.A. & Sirdeshmukh R. (2010). Activity and expression of adenosine  
365 diphosphate glucose pyrophosphorylase in developing rice grains: Varietal differences and  
366 implications on grain filling. *Plant Science*, 178(2), 123-129.

- 367 Dhatt B.K., Abshire N., Paul P., Hasanthika K., Sandhu J., Zhang Q., Obata T. & Walia H. (2019).  
368 Metabolic Dynamics of Developing Rice Seeds Under High Night-Time Temperature Stress.  
369 *Frontiers in Plant Science*, 10, 1443. <https://doi.org/10.3389/fpls.2019.01443>.
- 370 Dobo M., Ayres N., Walker G. & Park W. (2010). Polymorphism in the GBSS gene affects amylose content  
371 in US and European rice germplasm. *Journal of Cereal Science*, 52(3), 450-456.
- 372 Esguerra M.Q., Hemphill C.C. & Counce P.A. (2019). Differential Response of Arkansas Rice Varieties  
373 on High Nighttime Temperature (HNT) Treatments at Different Reproductive Stages. *B.R. Wells*  
374 *Arkansas Rice Research Studies*, 667, 34.
- 375 Feng F., Li Y., Qin X., Liao Y. & Siddique K. (2017). Changes in Rice Grain Quality of Indica and Japonica  
376 Type Varieties Released in China from 2000 to 2014. *Frontiers in Plant Science*, 8, 1863.
- 377 Fitzgerald M.A. & Resurreccion A.P. (2009). Maintaining the yield of edible rice in a warming world.  
378 *Functional Plant Biology*, 36(1), 1037–1045.
- 379 Fukuda M., Satoh-Cruz M., Wen L., Crofts A.J. Sugino A., Washida H., Okita T.W., Ogawa M., Kawagoe  
380 Y., Maeshima M. & Kumamaru T. (2011). The small GTPase Rab5a is essential for intracellular  
381 transport of proglutelin from the Golgi apparatus to the protein storage vacuole and endosomal  
382 membrane organization in developing rice endosperm. *Plant Physiology*, 157(2), 632–644.
- 383 Hirose T. & Terao T. (2004). A comprehensive expression analysis of the starch synthase gene family in  
384 rice (*Oryza sativa* L.). *Planta*, 220(1), 9-16.
- 385 Iglesias A.A. & Preiss J. (1992). Bacterial glycogen and plant starch biosynthesis. *Biochemical Education*,  
386 20(4), 196–203.
- 387 Ishimaru T., Hirose T., Matsuda T., Goto A., Takahashi K., Sasaki H., et al. (2005). Expression patterns  
388 of genes encoding carbohydrate-metabolizing enzymes and their relationship to grain filling in rice  
389 (*Oryza sativa* L.): comparison of caryopses located at different positions in a panicle. *Plant and*  
390 *Cell Physiology*, 46, 620-628.
- 391 Jagadish S.V.K., Murty M.V.R. & Quick W.P. (2015), Rice responses to rising temperatures. *Plant, Cell*  
392 *& Environment*, 38, 1686-1698.



- 393 Johnson P.E., Patron N.J., Bottrill A.R., Dinges J.R., Fahy B.F., Parker M. L., Waite D. N. & Denyer, K.  
394 (2003). A low-starch barley mutant, risø 16, lacking the cytosolic small subunit of ADP-glucose  
395 pyrophosphorylase, reveals the importance of the cytosolic isoform and the identity of the plastidial  
396 small subunit. *Plant Physiology*, 131(2), 684–696.
- 397 Kasem S., Waters D., Rice N., Shapter F. & Henry R. (2011). The Endosperm Morphology of Rice and its  
398 Wild Relatives as Observed by Scanning Electron Microscopy. *Rice*, 4, 12-20.
- 399 Kaneko K., Sasaki M., Kuribayashi N., Suzuki H., Sasuga Y., Shiraya T., Inomata T., Itoh K., Baslam M.  
400 & Mitsui, T. (2016). Proteomic and Glycomic Characterization of Rice Chalky Grains Produced  
401 Under Moderate and High-temperature Conditions in Field System. *Rice (New York, N.Y.)*, 9(1),  
402 26.
- 403 Kim K.S., Kang H.J., Hwang I.K., Hwang H.G., Kim T.Y. & Choi, H. C. (2004). Comparative ultrastructure  
404 of Ilpumbyeo, a high-quality japonica rice, and its mutant, Suweon 464: scanning and transmission  
405 electron microscopy studies. *Journal of Agricultural and Food Chemistry*, 52(12), 3876–3883.
- 406 Kusano M., Fukushima A., Fujita N., Okazaki Y., Kobayashi M., Oitome N., Ebana K. & Saito K. (2012).  
407 Deciphering Starch Quality of Rice Kernels Using Metabolite Profiling and Pedigree Network  
408 Analysis. *Molecular Plant*, 5, 442-51.
- 409 Lanning S., Siebenmorgen T., Counce P., Ambardekar A. & Mauromoustakos A. (2011). Extreme  
410 nighttime air temperatures in 2010 impact rice chalkiness and milling quality. *Field Crops  
411 Research*, 124, 132-136.
- 412 Lin Z., Zheng D., Zhang X., Wang Z., Lei J., Liu Z., Li G., Wang S. & Ding Y. (2016). Chalky part differs  
413 in chemical composition from translucent part of japonica rice grains as revealed by a notched-  
414 belly mutant with white-belly. *Journal of the Science of Food and Agriculture*, 96(11), 3937–3943.
- 415 Lisle A.J., Martin M. & Fitzgerald, M. A. (2000). Chalky and translucent rice grains differ in starch  
416 composition and structure and cooking properties. *Cereal Chemistry*, 77(5), 627–632.
- 417 Liu D., Wang W. & Cai X. (2014). Modulation of amylose content by structure-based modification of  
418 *OsGBSS1* activity in rice (*Oryza sativa L.*). *Plant Biotechnology Journal*, 12(9), 1297-1307.

- 419 Lu G., Third J. & Müller C.R. (2015). Discrete element models for non-spherical particle systems: From  
420 theoretical developments to applications. *Chemical Engineering Science*, 127(4), 425-465.
- 421 Mitsui T., Yamakawa H. & Kobata T. (2016). Molecular physiological aspects of chalking mechanism in  
422 rice grains under high-temperature stress. *Plant Production Science*, 19(1), 22-29.
- 423 Miura S., Crofts N., Saito Y., Hosaka Y., Oitome N. F., Watanabe T., Kumamaru T. & Fujita, N. (2018).  
424 Starch Synthase IIa-Deficient Mutant Rice Line Produces Endosperm Starch with Lower  
425 Gelatinization Temperature Than Japonica Rice Cultivars. *Frontiers in Plant Science*, 9, 645.  
426 <https://doi.org/10.3389/fpls.2018.00645>.
- 427 Moldenhauer K., Counce P. & Hardke J. (2018). Rice growth and development. *Rice Production Handbook*,  
428 192, 7-14.
- 429 Nakamura Y., Francisco P., Hosaka Y., Sato A., Sawada T., Kubo A. & Fujita N. (2005). Essential amino  
430 acid of starch synthase IIa differentiate amylopectin structure and starch quality between japonica  
431 and indica rice varieties. *Plant Molecular Biology*, 58, 213-27.
- 432 Nagamine A., Matsusaka H., Ushijima T., Kawagoe Y., Ogawa M., Okita T.W. & Kumamaru T. (2011). A  
433 role for the cysteine-rich 10 kDa prolamin in protein body I formation in rice. *Plant & Cell*  
434 *Physiology* 52, 1003–1016.
- 435 Nevame A., Emon R.M., Malek Md., Hasan M., Alam Md. A., Muharam F.M., Aslani F., Rafii M. & Ismail,  
436 M. (2018). Relationship between high temperature and formation of chalkiness and their effects on  
437 quality of rice. *BioMed Research International*, 2018, 1-18.
- 438 Ohdan T., Francisco P.B., Sawada T., Hirose T., Terao T., Satoh H. & Nakamura Y. (2005). Expression  
439 profiling of genes involved in starch synthesis in sink and source organs of rice. *Journal of*  
440 *Experimental Botany*, 56, 3229– 3244.
- 441 Park I., Ibanez A., Zhong F. & Shoemaker C. (2007). Gelatinization and pasting properties of waxy and  
442 non-waxy rice starches. *Starch*, 59(8), 388 - 396.
- 443 Pfister B. & Zeeman S.C. (2016). Formation of starch in plant cells. *Cellular and Molecular Life sciences:*  
444 *CMLS*, 73(14), 2781–2807.

- 445 Ponnala L., Wang Y., Sun Q. & van Wijk K.J. (2014). Correlation of mRNA and protein abundance in the  
446 developing maize leaf. *Plant Journal*, 78, 424-440.
- 447 Ren Y., Wang Y., Liu F., Zhou K., Ding Y., Zhou F., Wang Y., Liu K., Gan L., Ma W., Han X., Zhang X.,  
448 Guo X., Wu F., Cheng Z., Wang J., Lei C., Lin Q., Jiang L., Wu C., Bao Y., Wang H. & Wan J.  
449 (2014). GLUTELIN PRECURSOR ACCUMULATION3 encodes a regulator of post-Golgi  
450 vesicular traffic essential for vacuolar protein sorting in rice endosperm. *The Plant Cell*, 26(1),  
451 410–425.
- 452 Sivak M.N. & Preiss J. (1998). Starch: basic science to biotechnology. In: *Taylor SL (ed) Advances in Food*  
453 *and Nutrition Research*, pp 1–199. Academic Press, San Diego, California.
- 454 Sun H., Peng T., Zhao Y., Du Y., Zhang J., Li J., Xin Z. & Zhao Q. (2015). Dynamic Analysis of Gene  
455 Expression in Rice Superior and Inferior Grains by RNA-Seq. *PLoS One*. 10. e0137168.  
456 10.1371/journal.pone.0137168.
- 457 Sun Y., Jiao G., Liu Z., Zhang X., Li J., Guo X., Du W., Du J., Francis F., Zhao Y. & Xia L. (2017).  
458 Generation of High-Amylose Rice through CRISPR/Cas9-Mediated Targeted Mutagenesis of  
459 Starch Branching Enzymes. *Frontiers in Plant Science*, 8, 298.
- 460 Toyosawa Y., Kawagoe Y., Matsushima R., Crofts N., Ogawa M., Fukuda M., Kumamaru T., Okazaki Y.,  
461 Kusano M., Saito K., Toyooka K., Sato M., Ai Y., Jane J.L., Nakamura Y. & Fujita N. (2016).  
462 Deficiency of Starch Synthase IIIa and IVb alters starch granule morphology from polyhedral to  
463 spherical in rice endosperm. *Plant Physiology*, 170(3), 1255–1270.
- 464 Tuncel A., Kawaguchi J., Ihara Y., Matsusaka H., Nishi A., Nakamura T., Kuhara S., Hirakawa H.,  
465 Nakamura Y., Cakir B., Nagamine A., Okita T.W., Hwang S. K. & Satoh H. (2014). The rice  
466 endosperm ADP-glucose pyrophosphorylase large subunit is essential for optimal catalysis and  
467 allosteric regulation of the heterotetrameric enzyme. *Plant & Cell Physiology*, 55(6), 1169–1183.
- 468 Umemoto T. & Terashima K. (2002). Research note: Activity of granule-bound starch synthase is an  
469 important determinant of amylose content in rice endosperm. *Functional Plant Biology*,  
470 29(9):1121-1124.

- 471 Wang E., Wang J., Zhu X., Hao W., Wang L., Li Q., Zhang L., He W., Lu B., Lin H., Ma H., Zhang G. &  
472 He Z. (2008). Control of rice grain-filling and yield by a gene with a potential signature of  
473 domestication. *Nature Genetics*, 40(11), 1370–1374.
- 474 Xing S., Meng X., Zhou L., Mujahid H., Zhao C., Zhang Y., Wang C. & Peng Z. (2016). Proteome Profile  
475 of Starch Granules Purified from Rice (*Oryza sativa*) Endosperm. *PloS One*, 11(12), e0168467.
- 476 Xu J, Henry A & Sreenivasulu N. (2020) Rice yield formation under high day and night temperatures—A  
477 prerequisite to ensure future food security. *Plant Cell & Environment* 43, 1595–1608.
- 478 Yamakawa H. & Hakata M. (2010). Atlas of rice grain filling-related metabolism under high temperature:  
479 joint analysis of metabolome and transcriptome demonstrated inhibition of starch accumulation and  
480 induction of amino acid accumulation. *Plant & Cell Physiology*, 51(5), 795–809.
- 481 Zhang C., Chen S., Ren X., Lu Y., Liu D., Cai X., Li Q., Gao J. & Liu Q. (2017). Molecular structure and  
482 physicochemical properties of starches from rice with different amylose contents resulting from  
483 modification of *OsGBSSI* activity. *Journal of Agricultural and Food Chemistry*, 65(10), 2222–  
484 2232.
- 485 Zhao Q., Du X., Han Z., Ye Y., Pan, G., Asad M., Zhou Q. & Cheng, F. (2019). Suppression of starch  
486 synthase I (*SSI*) by RNA interference alters starch biosynthesis and amylopectin chain distribution  
487 in rice plants subjected to high temperature. *The Crop Journal*, 7(5), 573-586.
- 488

## 489 FIGURE LEGENDS

- 490 **Figure 1.** Illustration of the starch biosynthesis pathway. Flow of substrates and products are indicated  
491 by the arrows. Genes coding for the enzyme catalyzing a reaction are in bold and italics.  
492 Heatmaps for three genes in the two ultimate pathways are placed under the gene name with  
493 the specific isoform or subunit indicated. Columns in the heatmap indicate the stages 7 -  
494 42DAF.
- 495 **Figure 2.** Physical characteristics of rice grains of different genotypes using WinSEEDLE. Arrow  
496 points to the chalky area and arrowhead indicates a translucent portion of a grain. (A) ZHE  
497 733, (B) Nip, (C) N22, (D) Taggart, (E) Diamond, and (F) LaGrue.
- 498 **Figure 3.** Distribution of chalk sizes. Chalk sizes were classified relative to the area of the grain. None  
499 (no chalk), small (less than 10%), medium (11-20%), and large (more than 20%). Scale  
500 adopted from Standard Evaluation System for Rice (SES), 2002. (A) ZHE 733, (B)  
501 Nipponbare, (C) Nagina 22, (D) Taggart, (E) Diamond, and (F) LaGrue. Numbers are  
502 frequency counts from 50 grains observed.
- 503 **Figure 4.** Gene expression patterns. Expression patterns of *AGPL4*, *GBSSI* and *SSIIA* during  
504 reproductive phases in rice with reference to the *7UBIQ* expression. (A) ZHE 733, (B)  
505 Nipponbare, (C) N22, (D) Taggart, (E) Diamond, and (F) LaGrue.
- 506 **Figure 5.** Granular morphology. Morphology of the grain transverse cross-section under scanning  
507 electron microscopy (SEM) with a scale bar of 10 $\mu$ m. (A) ZHE 733, (B) Nipponbare, (C)  
508 Nagina 22, (D) Taggart, (E) Diamond, and (F) LaGrue. Arrowhead indicates the surface of  
509 amyloplast. Rings show polyhedral granules inside split amyloplast. Square indicates simple  
510 spherical granule. Triangle indicates simple polyhedral granules. Arrow points to protein  
511 bodies. Dashed line indicates the cracks from cross-sectioning the samples. Diamonds show  
512 micropores on the surface of amyloplast, which are the evidence of degradation activities.
- 513 **Figure 6.** Amylose and amylopectin content (%) relative to the total starch. Top=amylose and  
514 bottom=amylopectin. Asterisks indicate significant differences among the genotypes (\*\*at  
515  $p=0.01$ ). Lower case letters in each bar are the ranks from mean comparison. (A) ZHE 733,  
516 (B) Nipponbare, (C) N22, (D) Taggart, (E) Diamond, and (F) LaGrue.
- 517 **Figure 7.** Protein content in the grains of different genotypes. Significant at  $\alpha=0.05$ , bars with different  
518 letter designations are not comparable under Tukey's mean comparison. (A) ZHE 733, (B)  
519 Nip, (C) N22, (D) Taggart, (E) Diamond, and (F) LaGrue.
- 520 **Figure 8.** Effect of heat stress on gene expression. Relative expression of *AGPL4*, *GBSS1*, and *SSIIA*  
521 in normal and high nighttime temperature (HNT) conditions in (A) Diamond, (B) LaGrue  
522 and (C) ZHE 733 with reference to the *7UBIQ* expression. Solid lines indicate normal  
523 condition and dashed lines indicate HNT.
- 524 **Figure 9.** Physicochemical analysis of grains under normal and high nighttime temperature (HNT)  
525 conditions. (A-B) Grain images captured using WINSEEDLE and distribution of chalk sizes  
526 in Diamond (A) and LaGrue (B). (C-D) Granular morphology under scanning electron  
527 microscope (SEM) of Diamond (C) and LaGrue (D). (E) Amylose and amylopectin content  
528 in normal and HNT condition. (F) Protein concentration in normal and HNT condition.

529 **Figure 10.** Proposed mechanism of grain chalkiness. (A) Coordinated, and (B) Uncoordinated  
530 expression of *AGPL4*, *GBSSI* and *SSIIA* through early reproductive phases. (A) *AGPL4*, the  
531 regulatory unit of tetrameric *AGPase*, and monomeric *GBSSI* and *SSIIA* are upregulated in  
532 quick succession through early grain filling stages. As a result, the conversion of Glucose-1-  
533 Phosphate (1P) to ADP-Glucose (ADP) occurs in a timely manner to efficiently synthesize  
534 amylose and amylopectin. This coordinated expression leads to the formation of large  
535 polyhedral granules packed tightly in the grains. (B) A temporal gap between the  
536 upregulation of *AGLP4* and that of *GBSSI* and *SSIIA* leads to non-utilization of ADP,  
537 resulting in the reversal of ADP to 1P. When *GBSSI* and *SSIIA* are upregulated in  
538 subsequent stages, the limited pool of ADP may lead to early termination of chain elongation.  
539 This uncoordinated process leads to smaller granules of spherical or polyhedral shapes  
540 accommodating airspaces and protein bodies that appear as grain chalk. The heatmap  
541 represents developmental expression pattern of the high-chalky (Figure 2A) and low-chalky  
542 line (Figure 2D) through reproductive stages BP, AP, 5DAF, 10DAF, 15 DAF, and 20DAF.  
543 Linear chain of hexagons indicate amylose ( $\alpha 1 \rightarrow 4$  glycosidase linkage) and branched chain  
544 indicates amylopectin ( $\alpha 1 \rightarrow 4$  &  $1 \rightarrow 6$  glycosidase linkage).

545

546

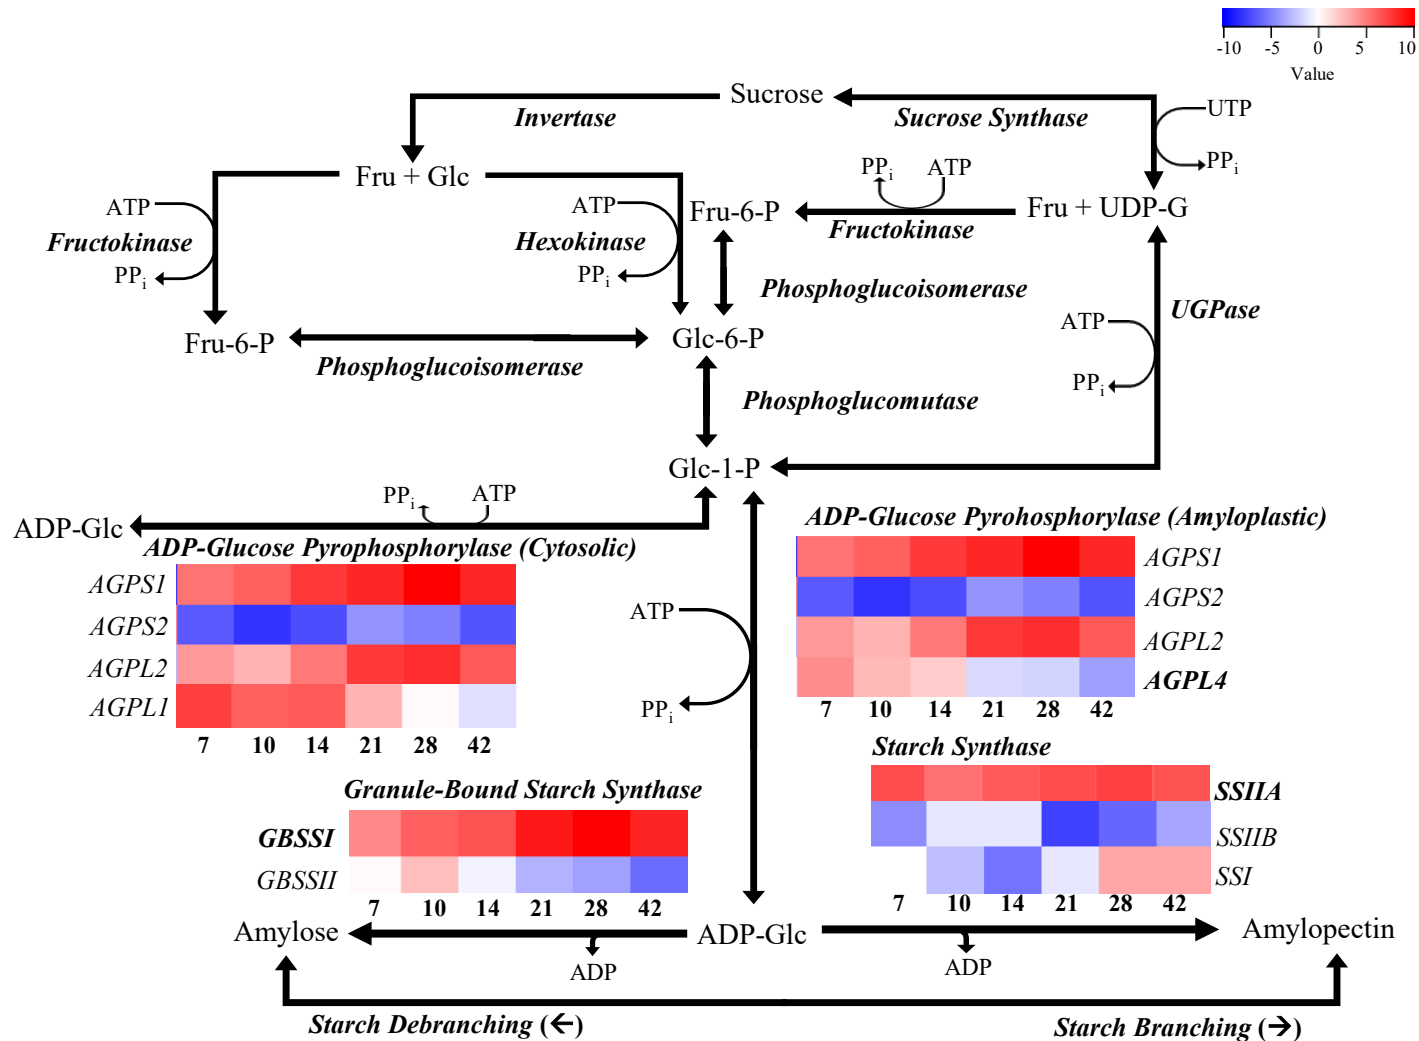

**Figure 1:** Illustration of the starch biosynthesis pathway. Flow of substrates and products are indicated by the arrows. Genes coding for the enzyme catalyzing a reaction are in bold and italics. Heatmaps for three genes in the two ultimate pathways are placed under the gene name with the specific isoform or subunit indicated. Columns in the heatmap indicate the stages 7 - 42DAF.

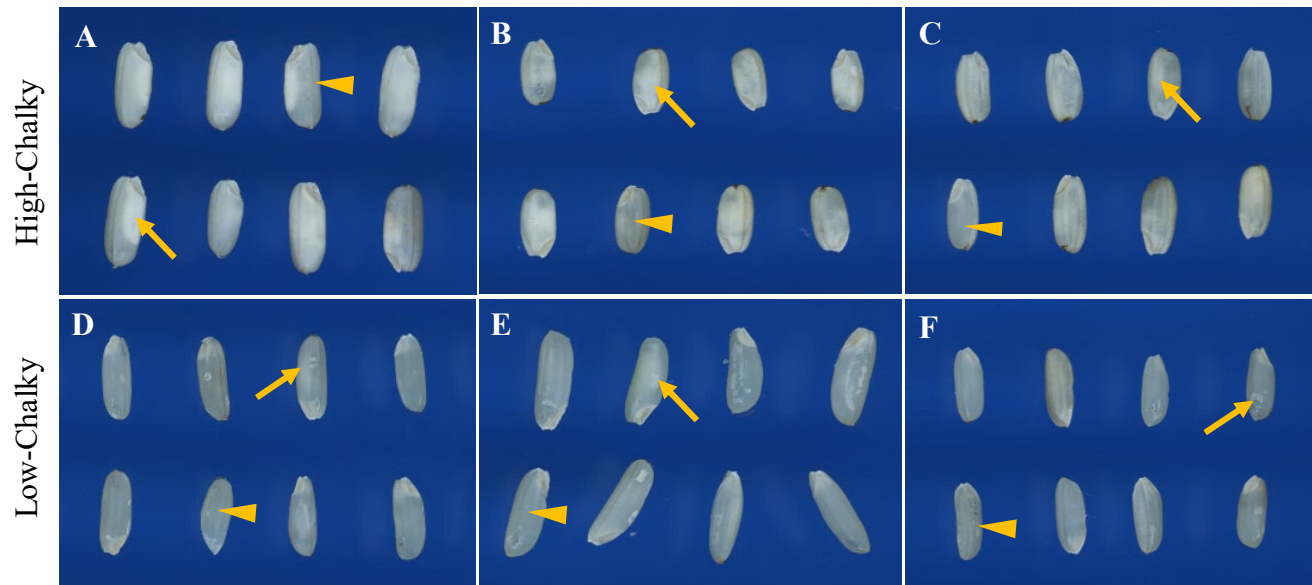

**Figure 2:** Physical characteristics of rice grains of different genotypes using WinSEEDLE. Arrow points to the chalky area and arrowhead indicates a translucent portion of a grain. (A) ZHE 733, (B) Nip, (C) N22, (D) Taggart, (E) Diamond, and (F) LaGrue.



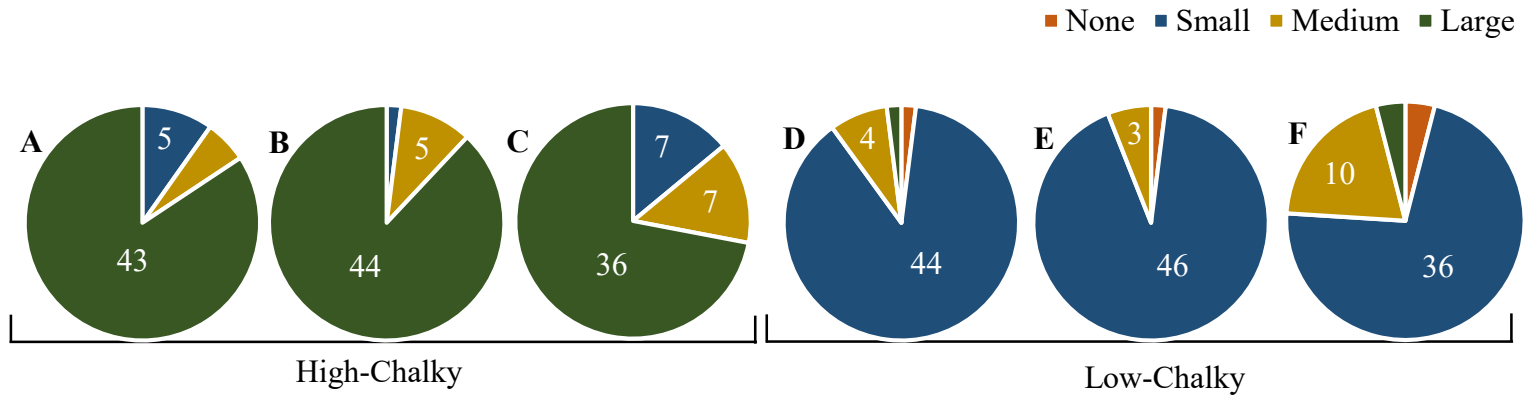

**Figure 3:** Distribution of chalk sizes. Chalk sizes were classified relative to the area of the grain. None (no chalk), small (less than 10%), medium (11-20%), and large (more than 20%). Scale adopted from Standard Evaluation System for Rice (SES), 2002. (A) ZHE 733, (B) Nipponbare, (C) Nagina 22, (D) Taggart, (E) Diamond, and (F) LaGrue. Numbers are frequency counts from 50 grains observed.

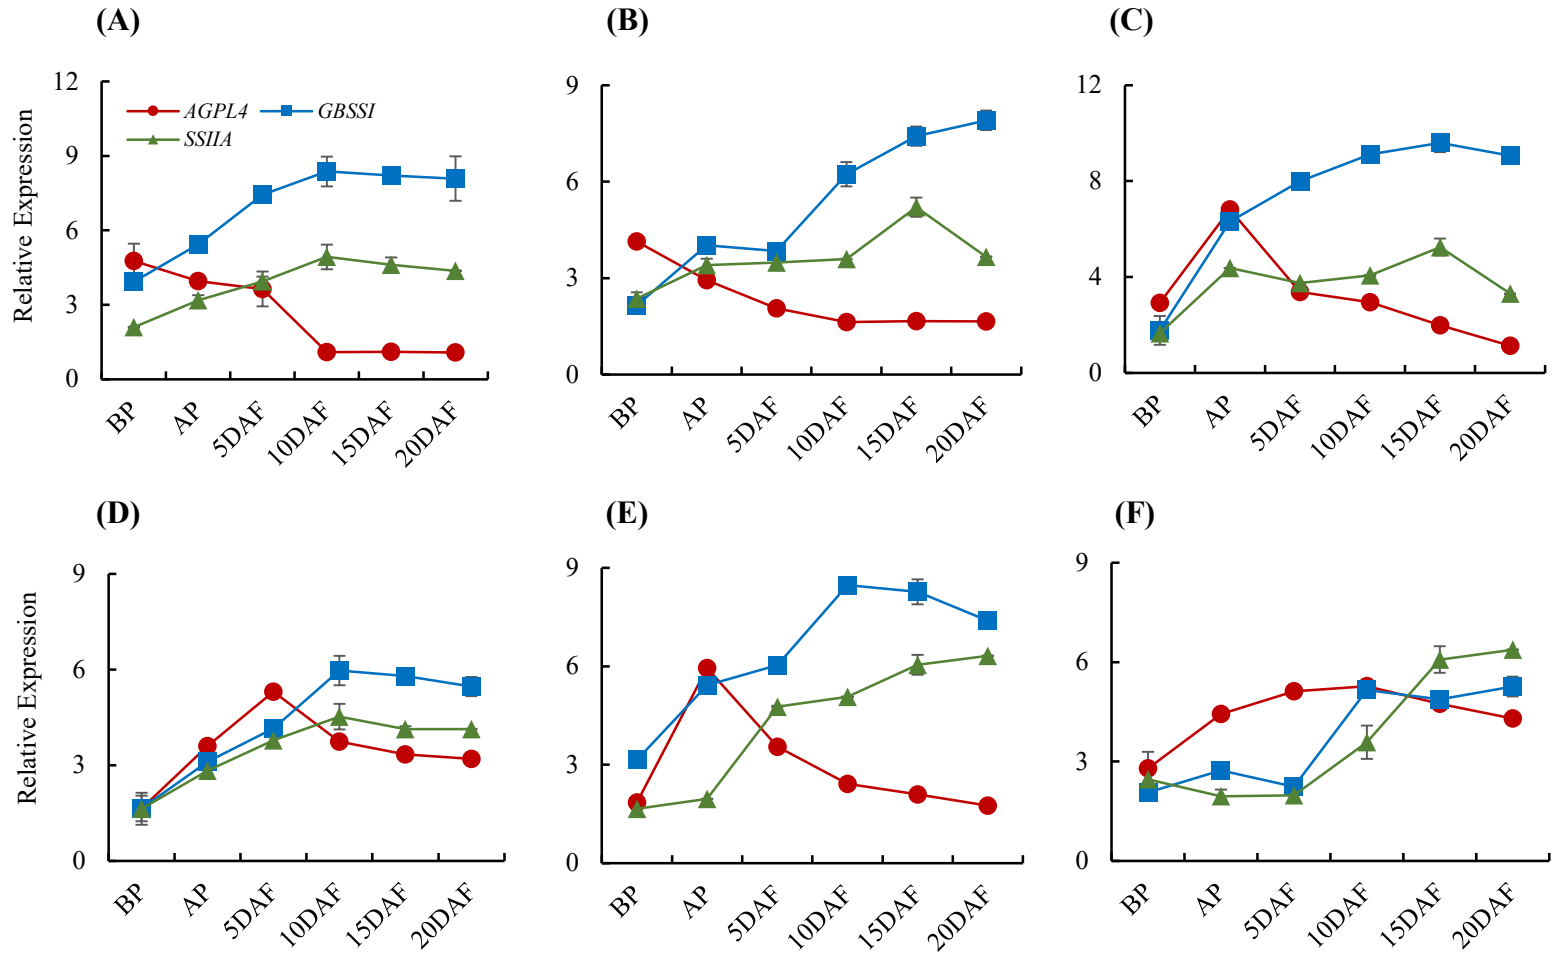

**Figure 4:** Gene expression patterns. Expression patterns of *AGPL4*, *GBSSI* and *SSIIA* during reproductive phases in rice with reference to the *7UBIQ* expression. (A) ZHE 733, (B) Nipponbare, (C) N22, (D) Taggart, (E) Diamond, and (F) LaGrue.

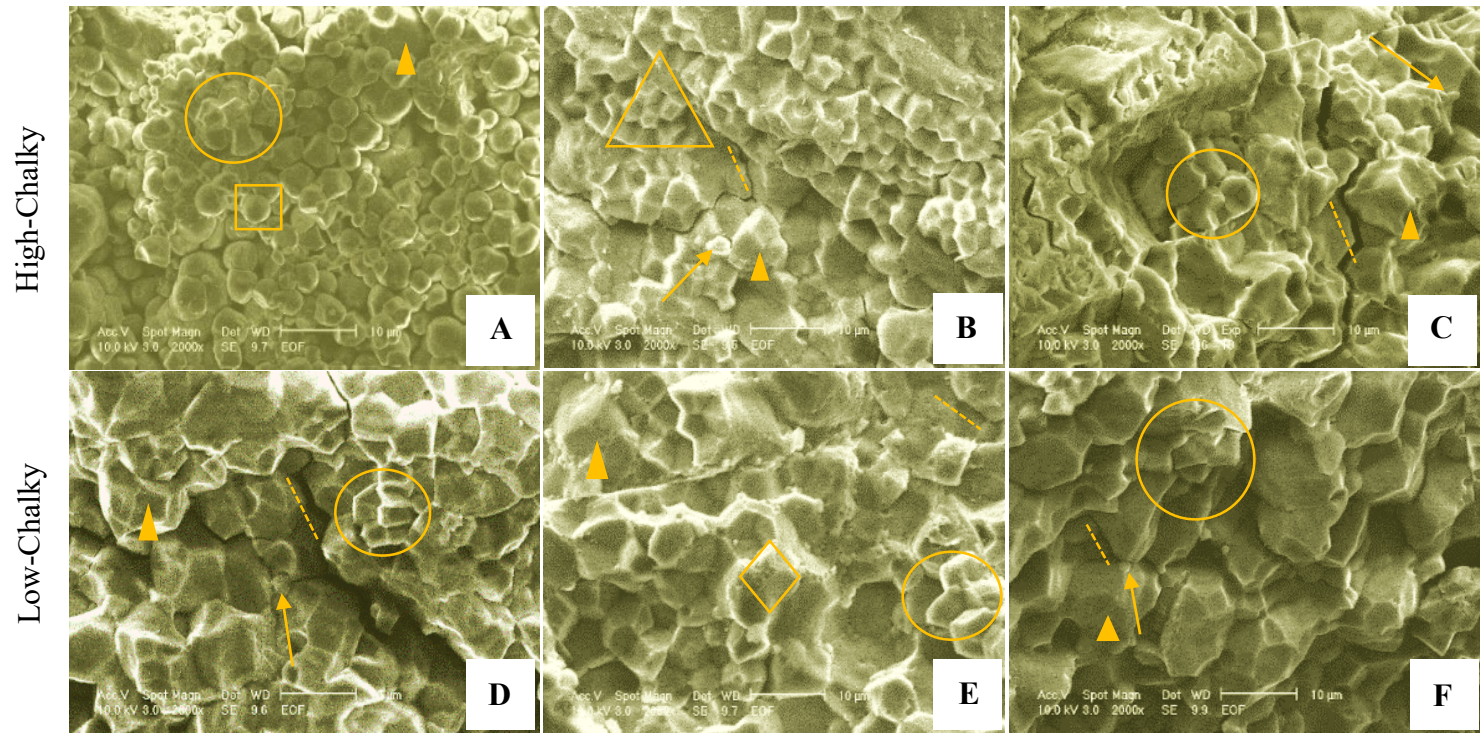

**Figure 5:** Granular morphology. Morphology of the grain transverse cross-section under scanning electron microscopy (SEM) with a scale bar of 10µm. (A) ZHE 733, (B) Nipponbare, (C) Nagina 22, (D) Taggart, (E) Diamond, and (F) LaGrue. Arrowhead indicates the surface of amyloplast. Rings show polyhedral granules inside split amyloplast. Square indicates simple spherical granule. Triangle indicates simple polyhedral granules. Arrow points to protein bodies. Dashed line indicates the cracks from cross-sectioning the samples. Diamonds show micropores on the surface of amyloplast, which are the evidence of degradation activities.

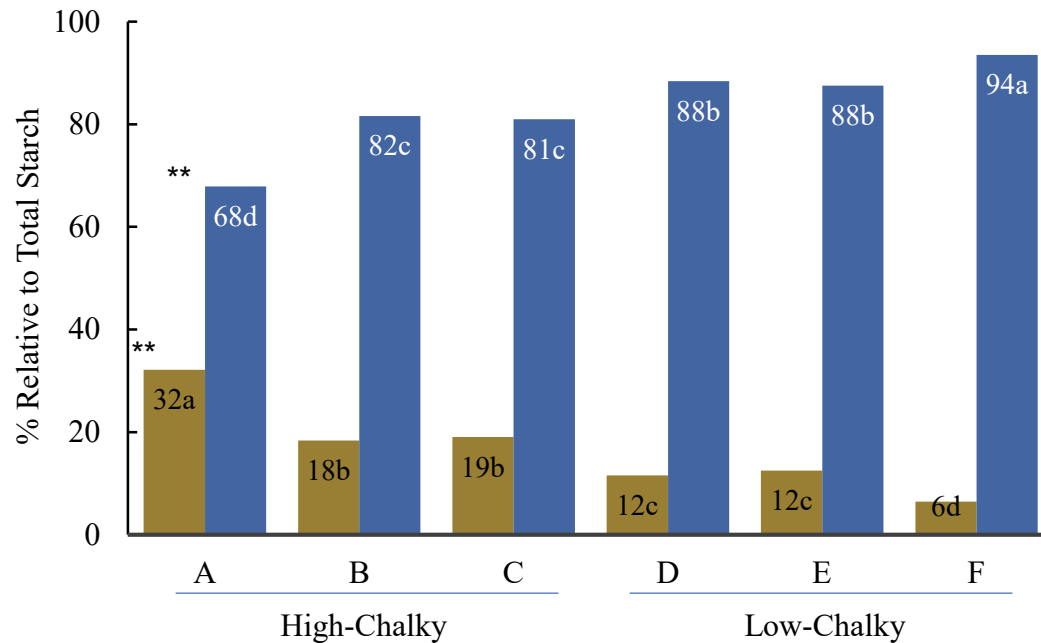

**Figure 6:** Amylose and amylopectin content (%) relative to the total starch. Top=amylose and bottom=amylopectin. Asterisks indicate significant differences among the genotypes (\*\*at p=0.01). Lower case letters in each bar are the ranks from mean comparison. (A) ZHE 733, (B) Nipponbare, (C) N22, (D) Taggart, (E) Diamond, and (F) LaGrue

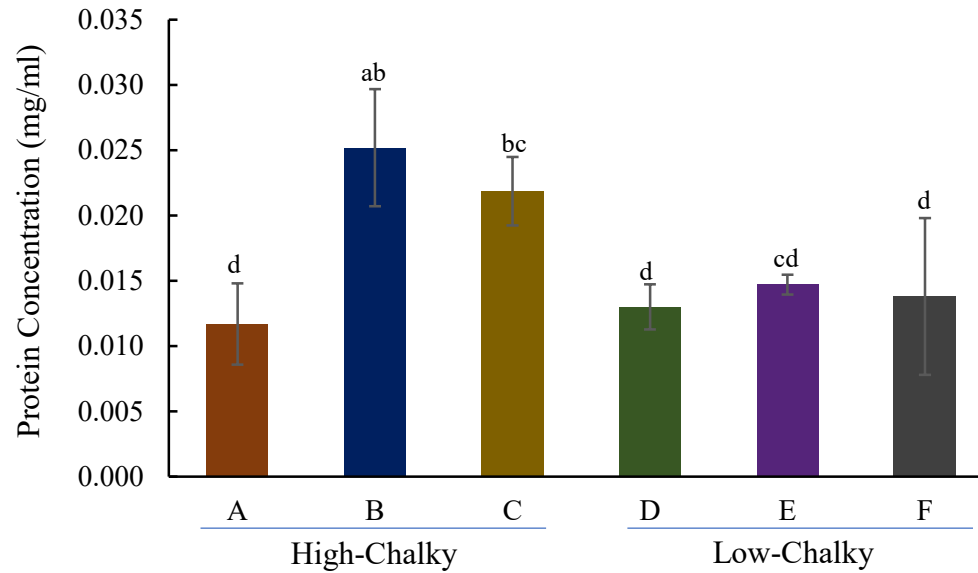

**Figure 7:** Protein content in the grains of different genotypes. Significant at  $\alpha=0.05$ , bars with different letter designations are not comparable under Tukey's mean comparison. (A) ZHE 733, (B) Nip, (C) N22, (D) Taggart, (E) Diamond, and (F) LaGrue.

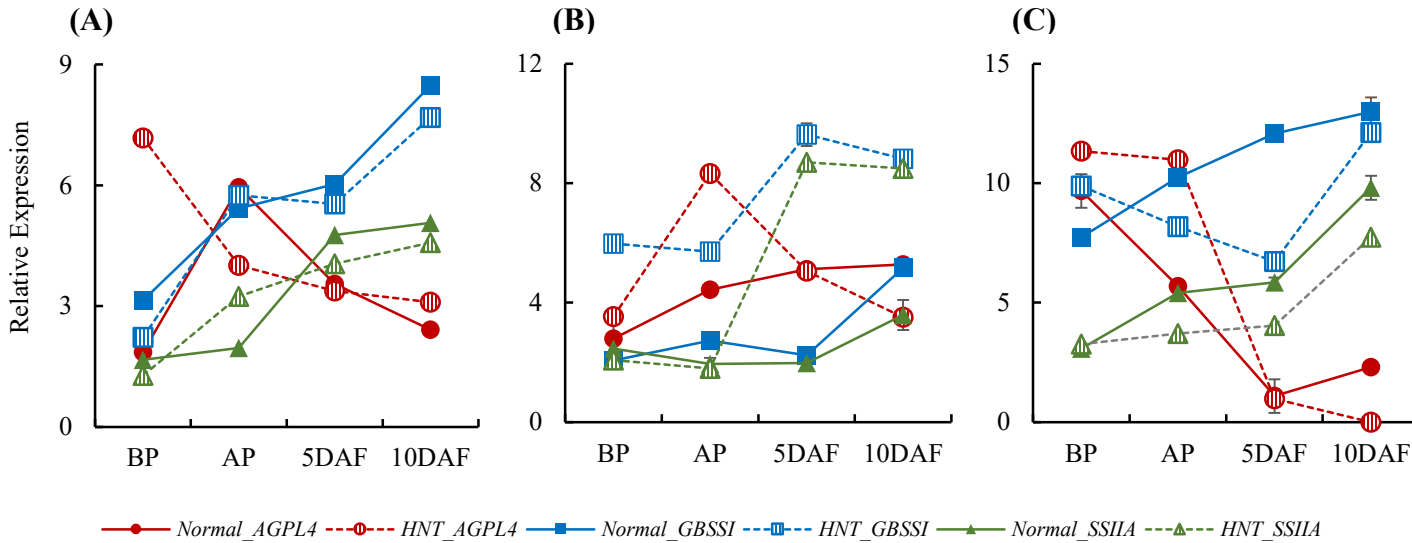

**Figure 8:** Effect of heat stress on gene expression. Relative expression of AGPL4, GBSS1, and SSIIA in normal and high nighttime temperature (HNT) conditions in (A) Diamond, (B) LaGrue and (C) ZHE 733 with reference to the *TUBIQ* expression. Solid lines indicate normal condition and dashed lines indicate HNT

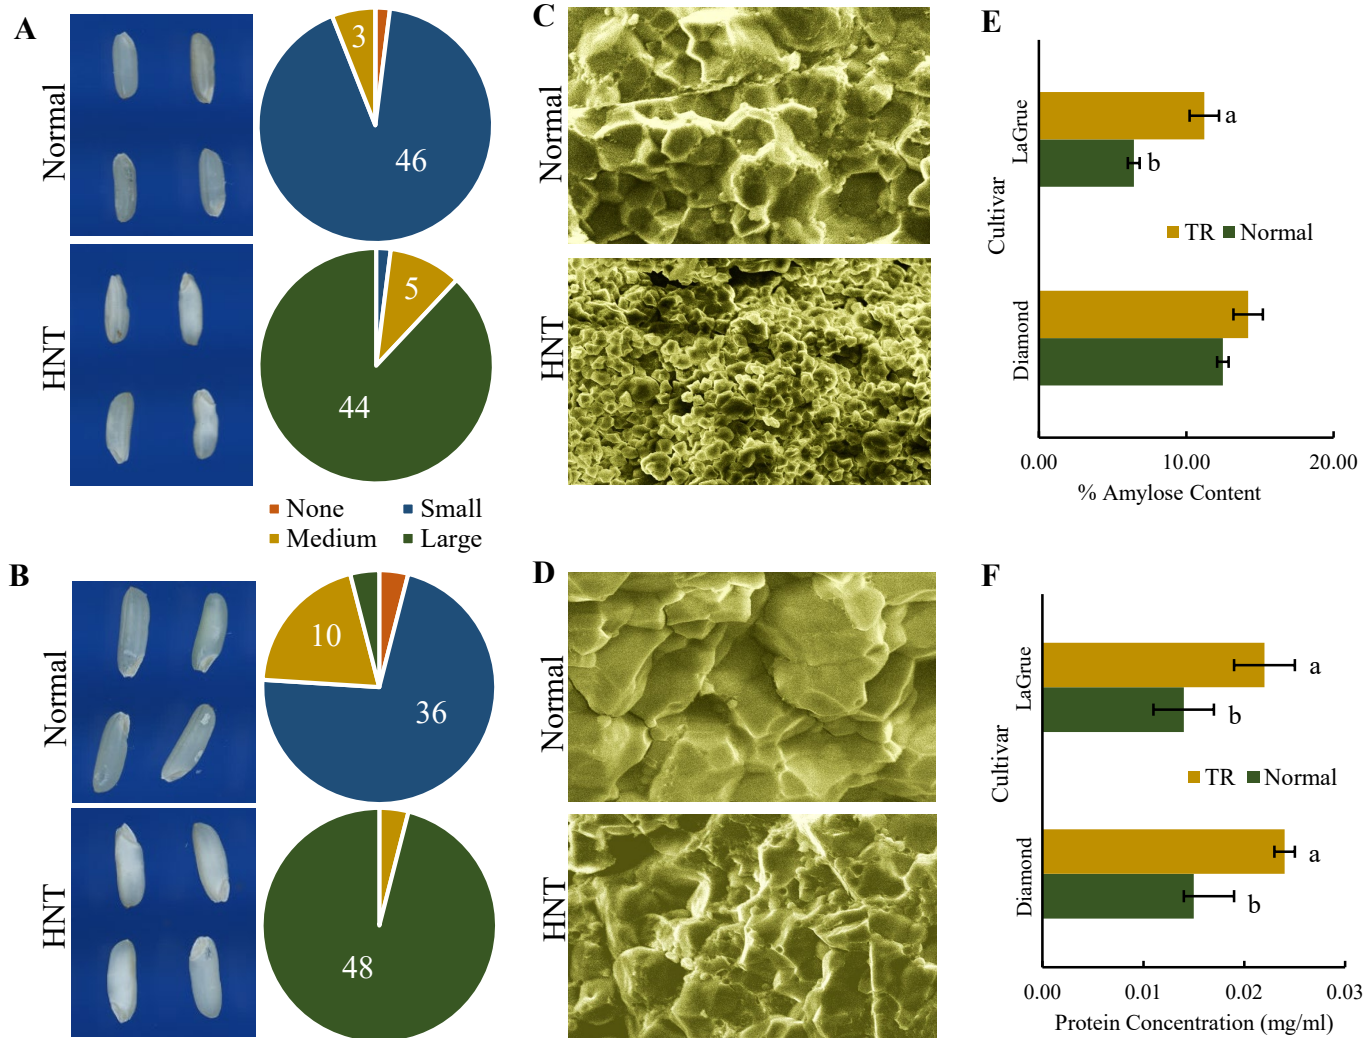

**Figure 9:** Physicochemical analysis of grains under normal and high nighttime temperature (HNT) conditions. (A-B) Grain images captured using WINSEEDLE and distribution of chalk sizes in Diamond (A) and LaGrue (B). (C-D) Granular morphology under scanning electron microscope (SEM) of Diamond (C) and LaGrue (D). (E) Amylose and amylopectin content in normal and HNT condition. (F) Protein concentration in normal and HNT condition.

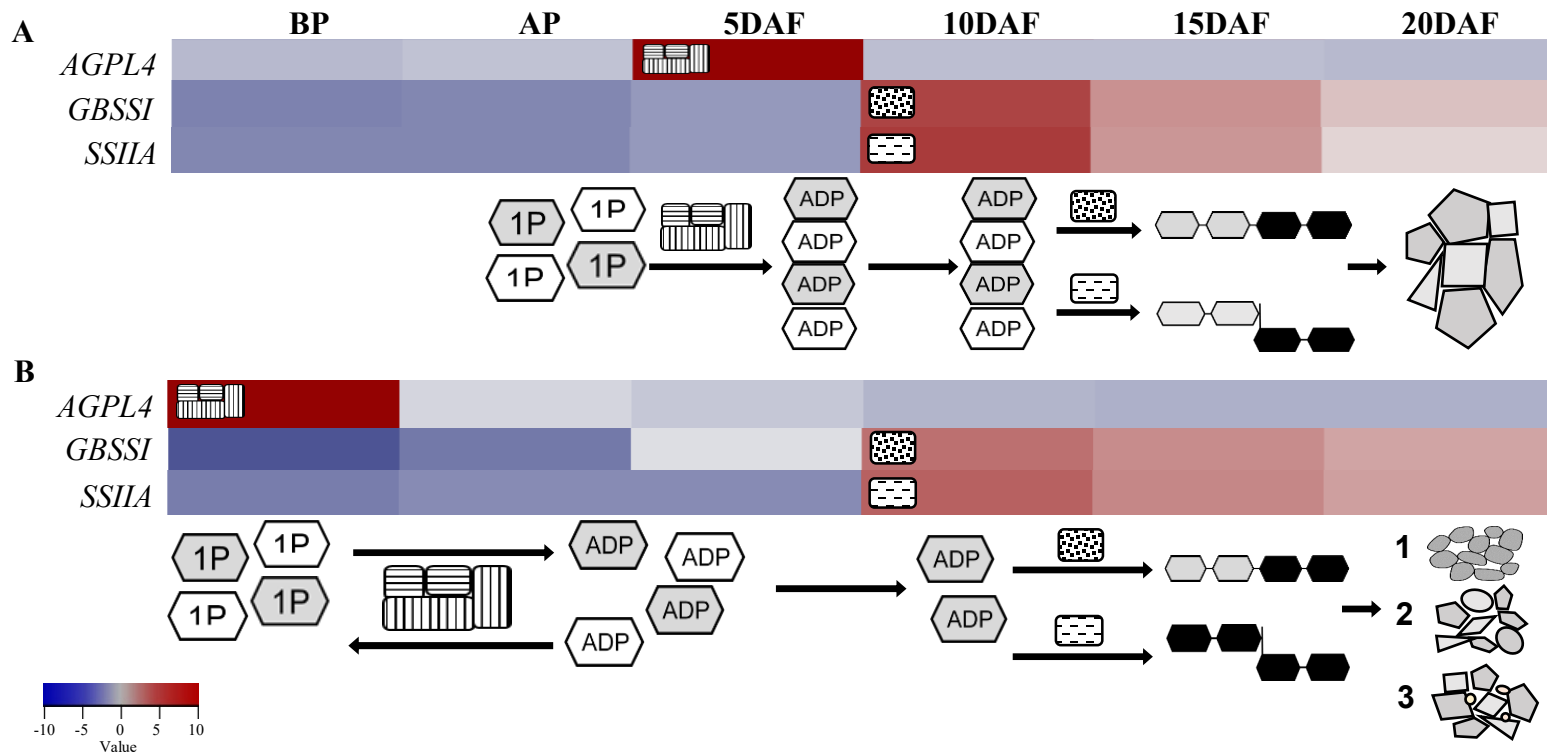

**Figure 10:** Proposed mechanism of grain chalkiness. (A) Coordinated, and (B) Uncoordinated expression of *AGPL4*, *GBSSI* and *SSIIA* through early reproductive phases. (A) *AGPL4*, the regulatory unit of tetrameric AGPase, and monomeric *GBSSI* and *SSIIA* are upregulated in quick succession through early grain filling stages. As a result, the conversion of Glucose-1-Phosphate (1P) to ADP-Glucose (ADP) occurs in a timely manner to efficiently synthesize amylose and amylopectin. This coordinated expression leads to the formation of large polyhedral granules packed tightly in the grains. (B) A temporal gap between the upregulation of *AGPL4* and that of *GBSSI* and *SSIIA* leads to non-utilization of ADP, resulting in the reversal of ADP to 1P. When *GBSSI* and *SSIIA* are upregulated in subsequent stages, the limited pool of ADP may lead to early termination of chain elongation. This uncoordinated process leads to smaller granules of spherical or polyhedral shapes accommodating airspaces and protein bodies that appear as grain chalk. The heatmap represents developmental expression pattern of the high-chalky (Figure 2A) and low-chalky line (Figure 2D) through reproductive stages BP, AP, 5DAF, 10DAF, 15 DAF, and 20DAF. Linear chain of hexagons indicate amylose ( $\alpha 1 \rightarrow 4$  glycosidase linkage) and branched chain indicates amylopectin ( $\alpha 1 \rightarrow 4$  &  $1 \rightarrow 6$  glycosidase linkage).
